# Supplementary material for: Protective factors for child development at age 2 in the presence of poor maternal mental health: results from the All Our Babies (AOB) pregnancy cohort
Source: PubMed Central journal article supplement — BMJ Open. 2016 Nov 10;6(11):e012096. doi: 10.1136/bmjopen-2016-012096 (PMC5128911; doi:10.1136/bmjopen-2016-012096), 2016-11-10
Supplement: bmjopen-2016-012096supp_AppendixA.pdf [file bmjopen-2016-012096supp_AppendixA.pdf]

## Appendix A. Description of protective factors examined for child development

| Category                                                    | Protective Factor                                                                       | Risk category                                    | Protective category                              |
|-------------------------------------------------------------|-----------------------------------------------------------------------------------------|--------------------------------------------------|--------------------------------------------------|
| Socio-demographic factors                                   | Maternal age at delivery                                                                | <35 years                                        | ≥35 years                                        |
|                                                             | Marital status                                                                          | single, separated, divorced                      | married, common law                              |
|                                                             | Maternal education                                                                      | High school or less                              | Some post secondary                              |
|                                                             | Household income                                                                        | <\$80,000                                        | ≥\$80,000                                        |
|                                                             | Family status                                                                           | Single parent family                             | Two parent family                                |
| Pregnancy and birth outcome factors                         | Social support during pregnancy (MOS-SSS)                                               | Lower (MOS-SSS ≤69)                              | Higher (MOS-SSS >69)                             |
|                                                             | Optimism during pregnancy (LOT-R)                                                       | Lower (LOT-R ≤13)                                | Higher (LOT-R >13)                               |
|                                                             | Gestational age at delivery                                                             | Preterm (<37 weeks)                              | Term (≥37 weeks)                                 |
|                                                             | Birth weight                                                                            | Low birth weight (<2500 grams)                   | Not low birth weight (≥2500 grams)               |
|                                                             | Child sex                                                                               | Male                                             | Female                                           |
| Postpartum factors (up to 1 year)                           | Social support at 4 months postpartum (MOS-SSS)                                         | Lower (MOS-SSS ≤69)                              | Higher (MOS-SSS >69)                             |
|                                                             | Parenting morale at 4 months postpartum (PMI)                                           | Lower (PMI ≤33)                                  | Higher (PMI >33)                                 |
|                                                             | Social support at 1 year postpartum (NLSCY-SSS)                                         | Lower (NLSCY-SSS ≤17)                            | Higher (NLSCY-SSS >17)                           |
|                                                             | Happiness in their relationship at 1 year postpartum                                    | A little unhappy/quite unhappy/extremely unhappy | Happy/very happy/extremely happy/perfectly happy |
|                                                             | Co-parenting agreement at 1 year postpartum                                             | Not sure/disagree/strongly disagree              | Strongly agree/agree                             |
| Parenting, childcare environment and community resource use | Social support at 2 years postpartum (NLSCY-SSS)                                        | Lower (NLSCY-SSS ≤17)                            | Higher (NLSCY-SSS >17)                           |
|                                                             | Parent-child interaction reading: child was consistently read to daily at 1 and 2 years | No                                               | Yes                                              |
|                                                             | Parenting child                                                                         | No                                               | Yes                                              |

|                                                                                                              |                                                         |                                                 |
|--------------------------------------------------------------------------------------------------------------|---------------------------------------------------------|-------------------------------------------------|
| interaction play: A parent consistently played imitation games with the child daily at 1 and 2 years         |                                                         |                                                 |
| Mother working or studying at 2 years<br>Yes<br>No                                                           | Yes                                                     | No                                              |
| Mother's perceived ability to fulfill family, work or other responsibilities when child was 2 years old      | It is difficult most of the time/it is always difficult | It is sometimes difficult/it is never difficult |
| Childcare arrangement when child was 2 years old                                                             | Childcare center/day home                               | Parent/relative/nanny home                      |
| Regular exposure to a language other than English at 2 years of age                                          | Yes                                                     | No                                              |
| Time it takes child to fall asleep at night (in general)                                                     | >30 minutes                                             | ≤30 minutes                                     |
| Average total time spent napping each day                                                                    | <1 hour                                                 | ≥1 hour                                         |
| How often child wakes at night                                                                               | ≥3 times per week                                       | <3 times per week                               |
| When child started sleeping through the night                                                                | Isn't sleeping through the night yet                    | Before 2 years                                  |
| Number of ear infections                                                                                     | ≥1                                                      | none                                            |
| Time child is physically active per day at 2 years of age (playing, walking, jumping, running, dancing etc.) | <3 hours                                                | ≥3 hours                                        |
| Screen time per day (from all types of media: television, movies/DVD's, computer/tablet)                     | ≥1 hour                                                 | <1 hour                                         |
| Used a library or attended a story time                                                                      | No                                                      | Yes                                             |
| Used a recreation facility and/or a drop-in childcare center in                                              | No                                                      | Yes                                             |

|  |                                                                                                                |              |              |
|--|----------------------------------------------------------------------------------------------------------------|--------------|--------------|
|  | the past year                                                                                                  |              |              |
|  | Used a parenting support: parenting group, program or center                                                   | No           | Yes          |
|  | Used a social support: informal play group                                                                     | No           | Yes          |
|  | Use of community resources: library, recreation facility/ drop-in childcare, parenting support, social support | <3 resources | ≥3 resources |

MOS-SSS = The Medical Outcomes Study - Social Support Survey

LOT-R = The Life-Orientation Test-Revised

PMI = The Parenting Morale Index

NLSCY-SSS = The National Longitudinal Survey of Children and Youth Social Support Scale
